# Supplementary material for: Structure of nascent 5S RNPs at the crossroad between ribosome assembly and MDM2–p53 pathways
Source: PubMed Central journal article supplement (PMC10442235; doi:10.1038/s41594-023-01006-7), 2023-06-08

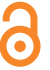

---

# Structure of nascent 5S RNPs at the crossroad between ribosome assembly and MDM2–p53 pathways

---

In the format provided by the authors and unedited

---

Nsa3-FtpA  
(Non-Depleted)

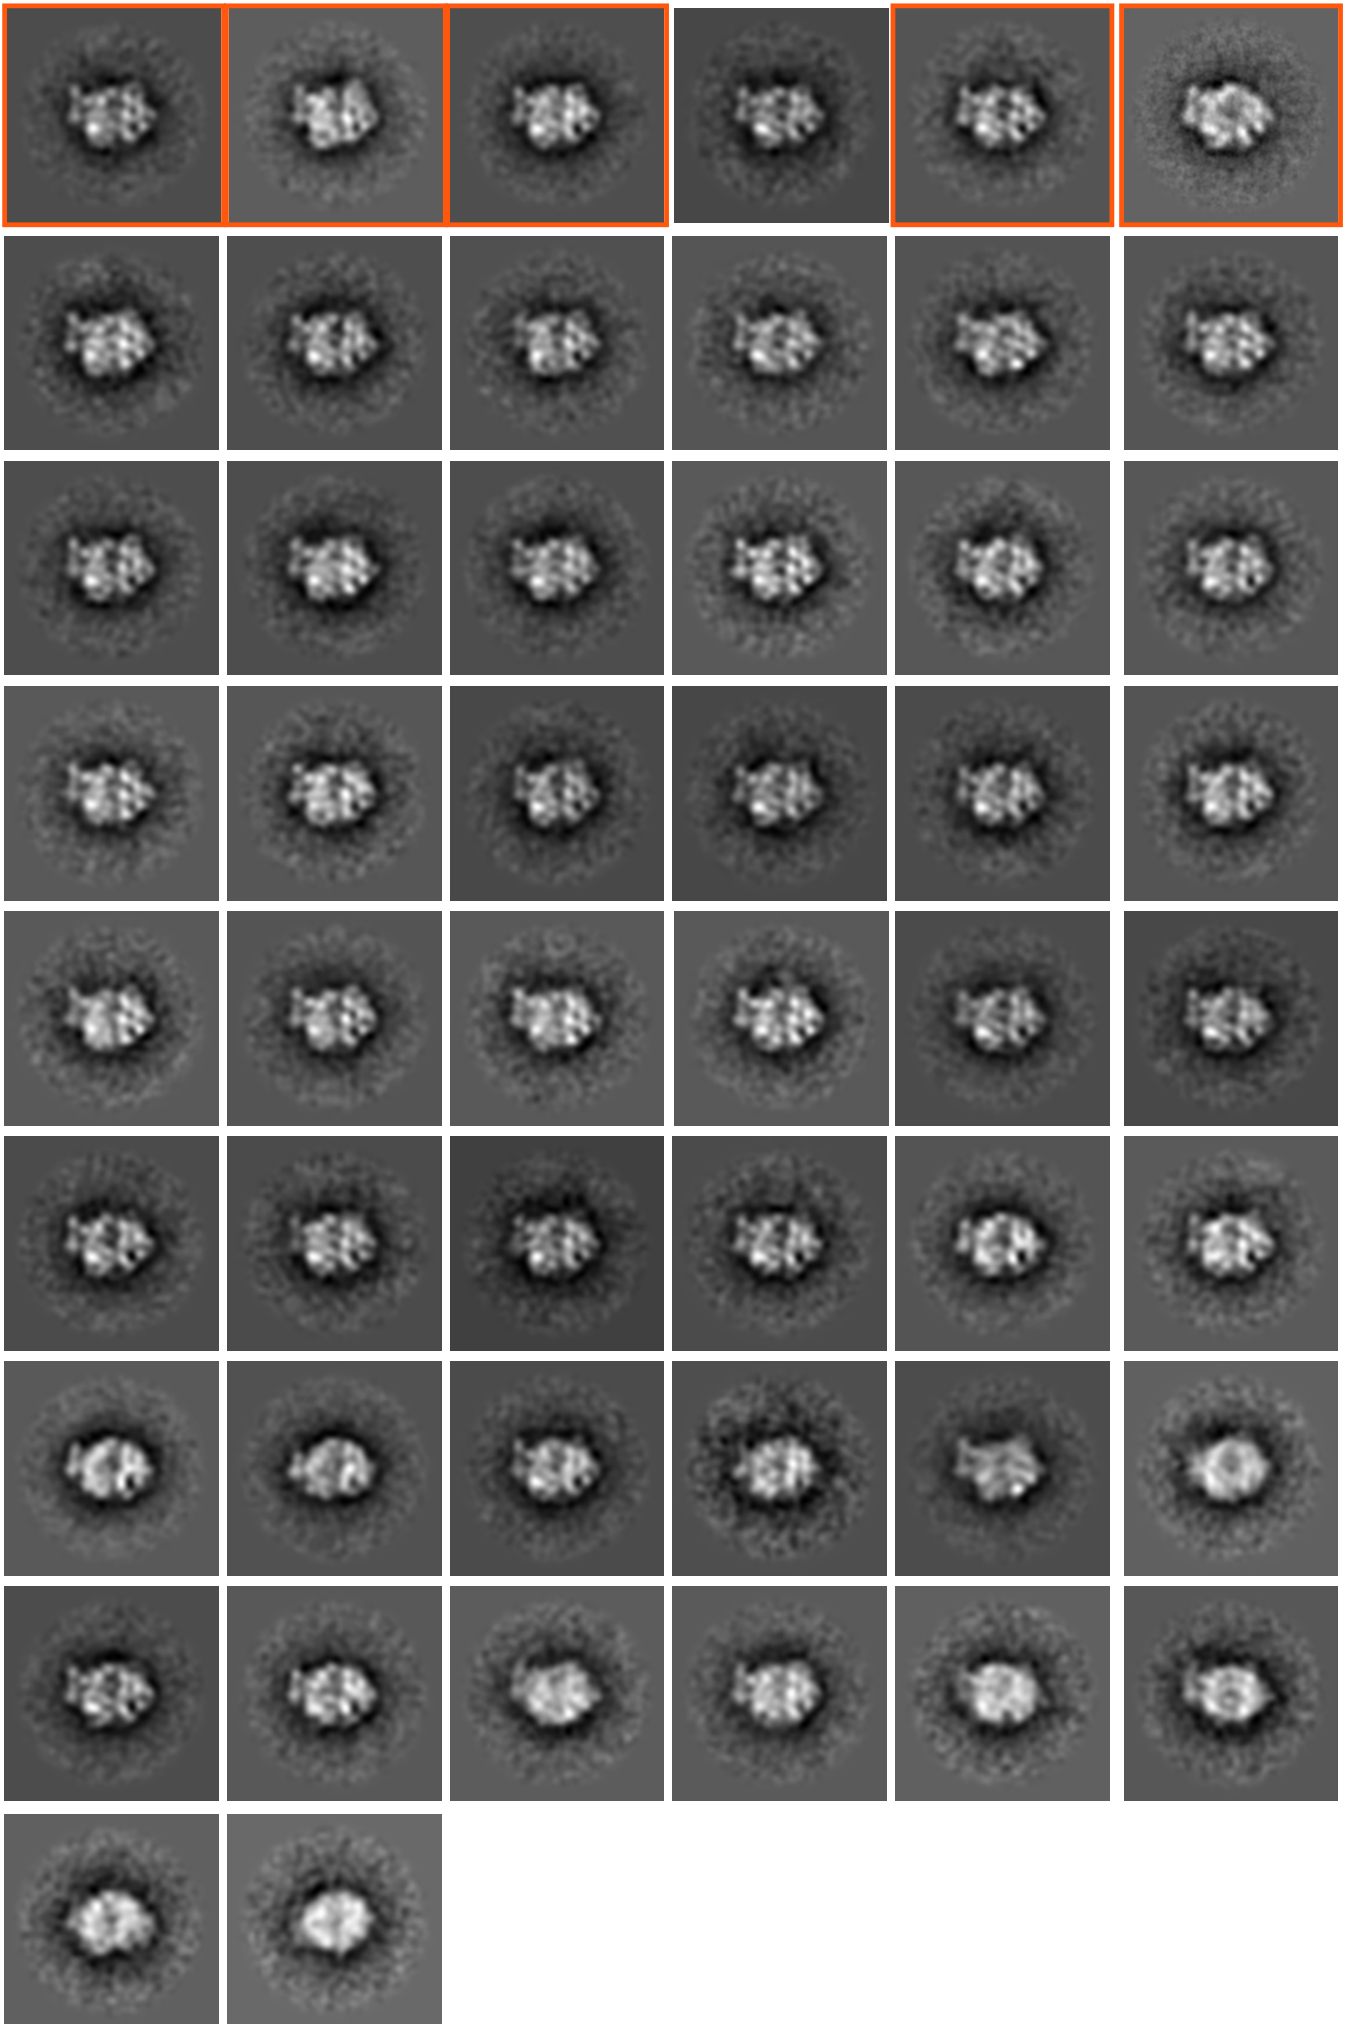

Nsa3-FtpA  
(5S RNP-depleted)

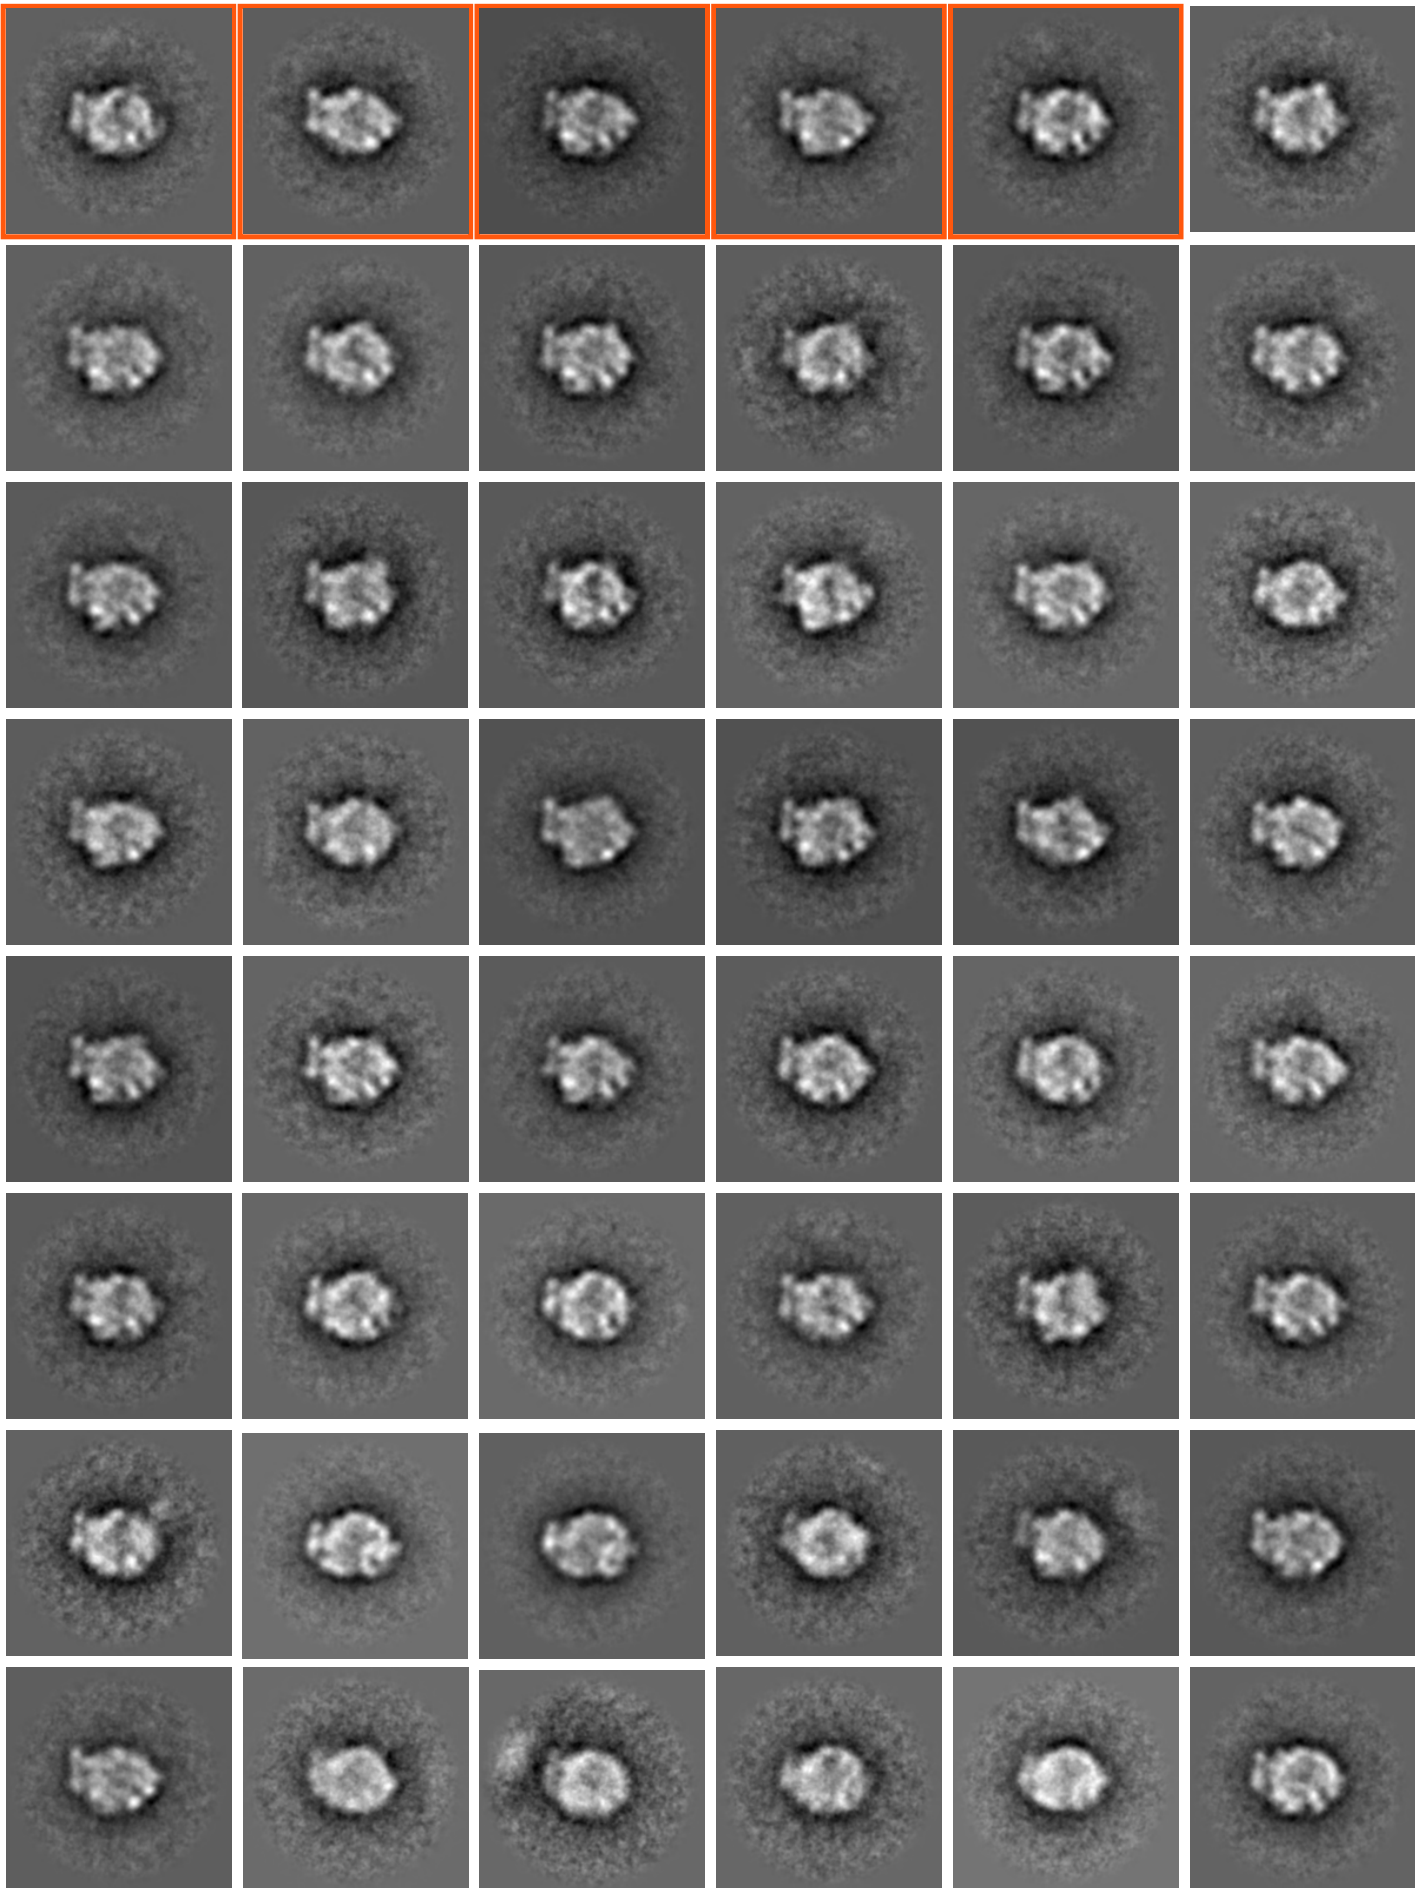

Nsa3-FtpA  
(5S RNP-depleted)  
+ 5SRNP

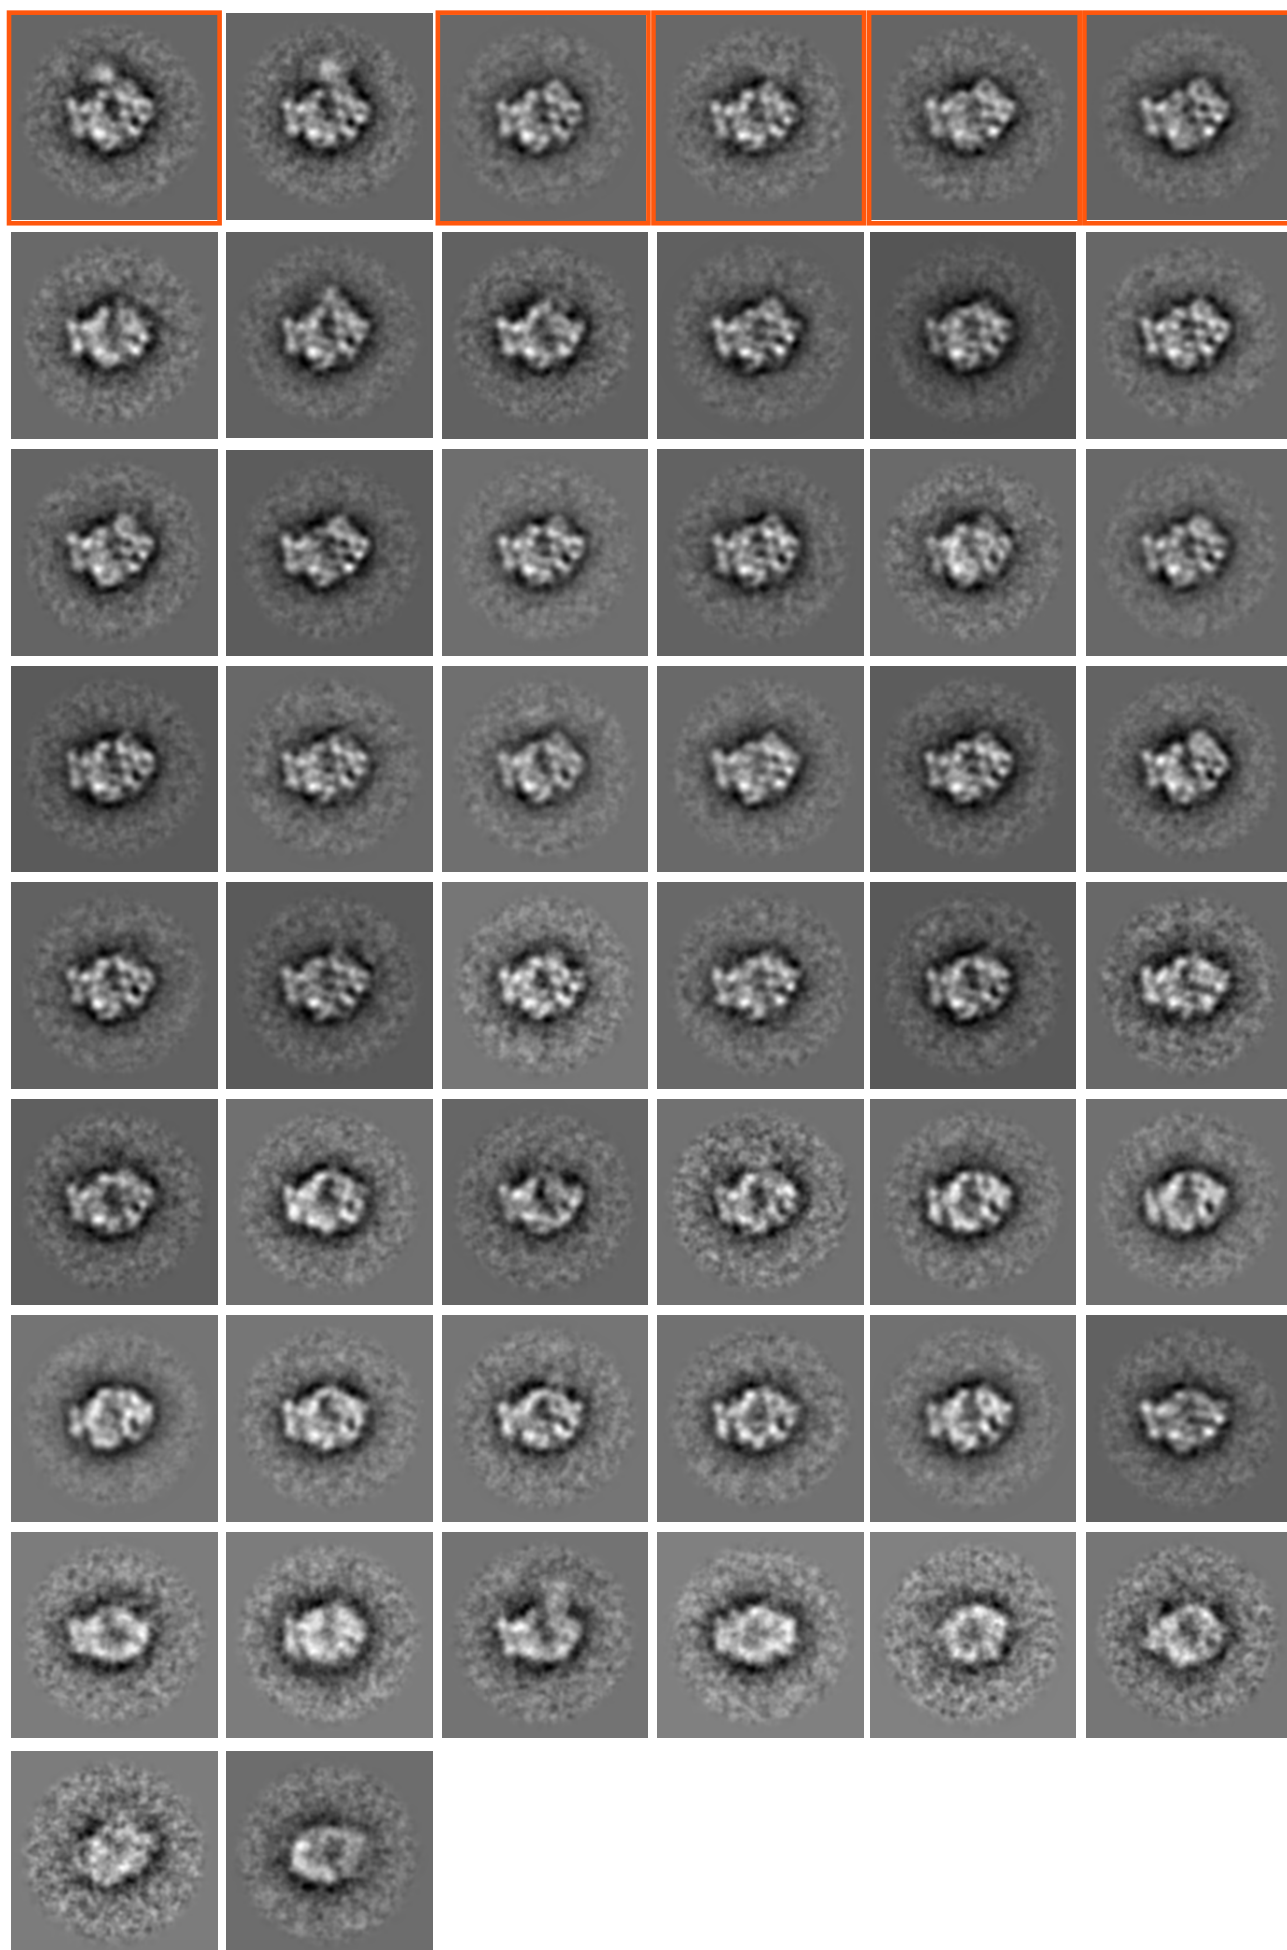

Nsa3-FtpA  
(5S RNP-depleted)  
+ 5SRNP-3XGFP

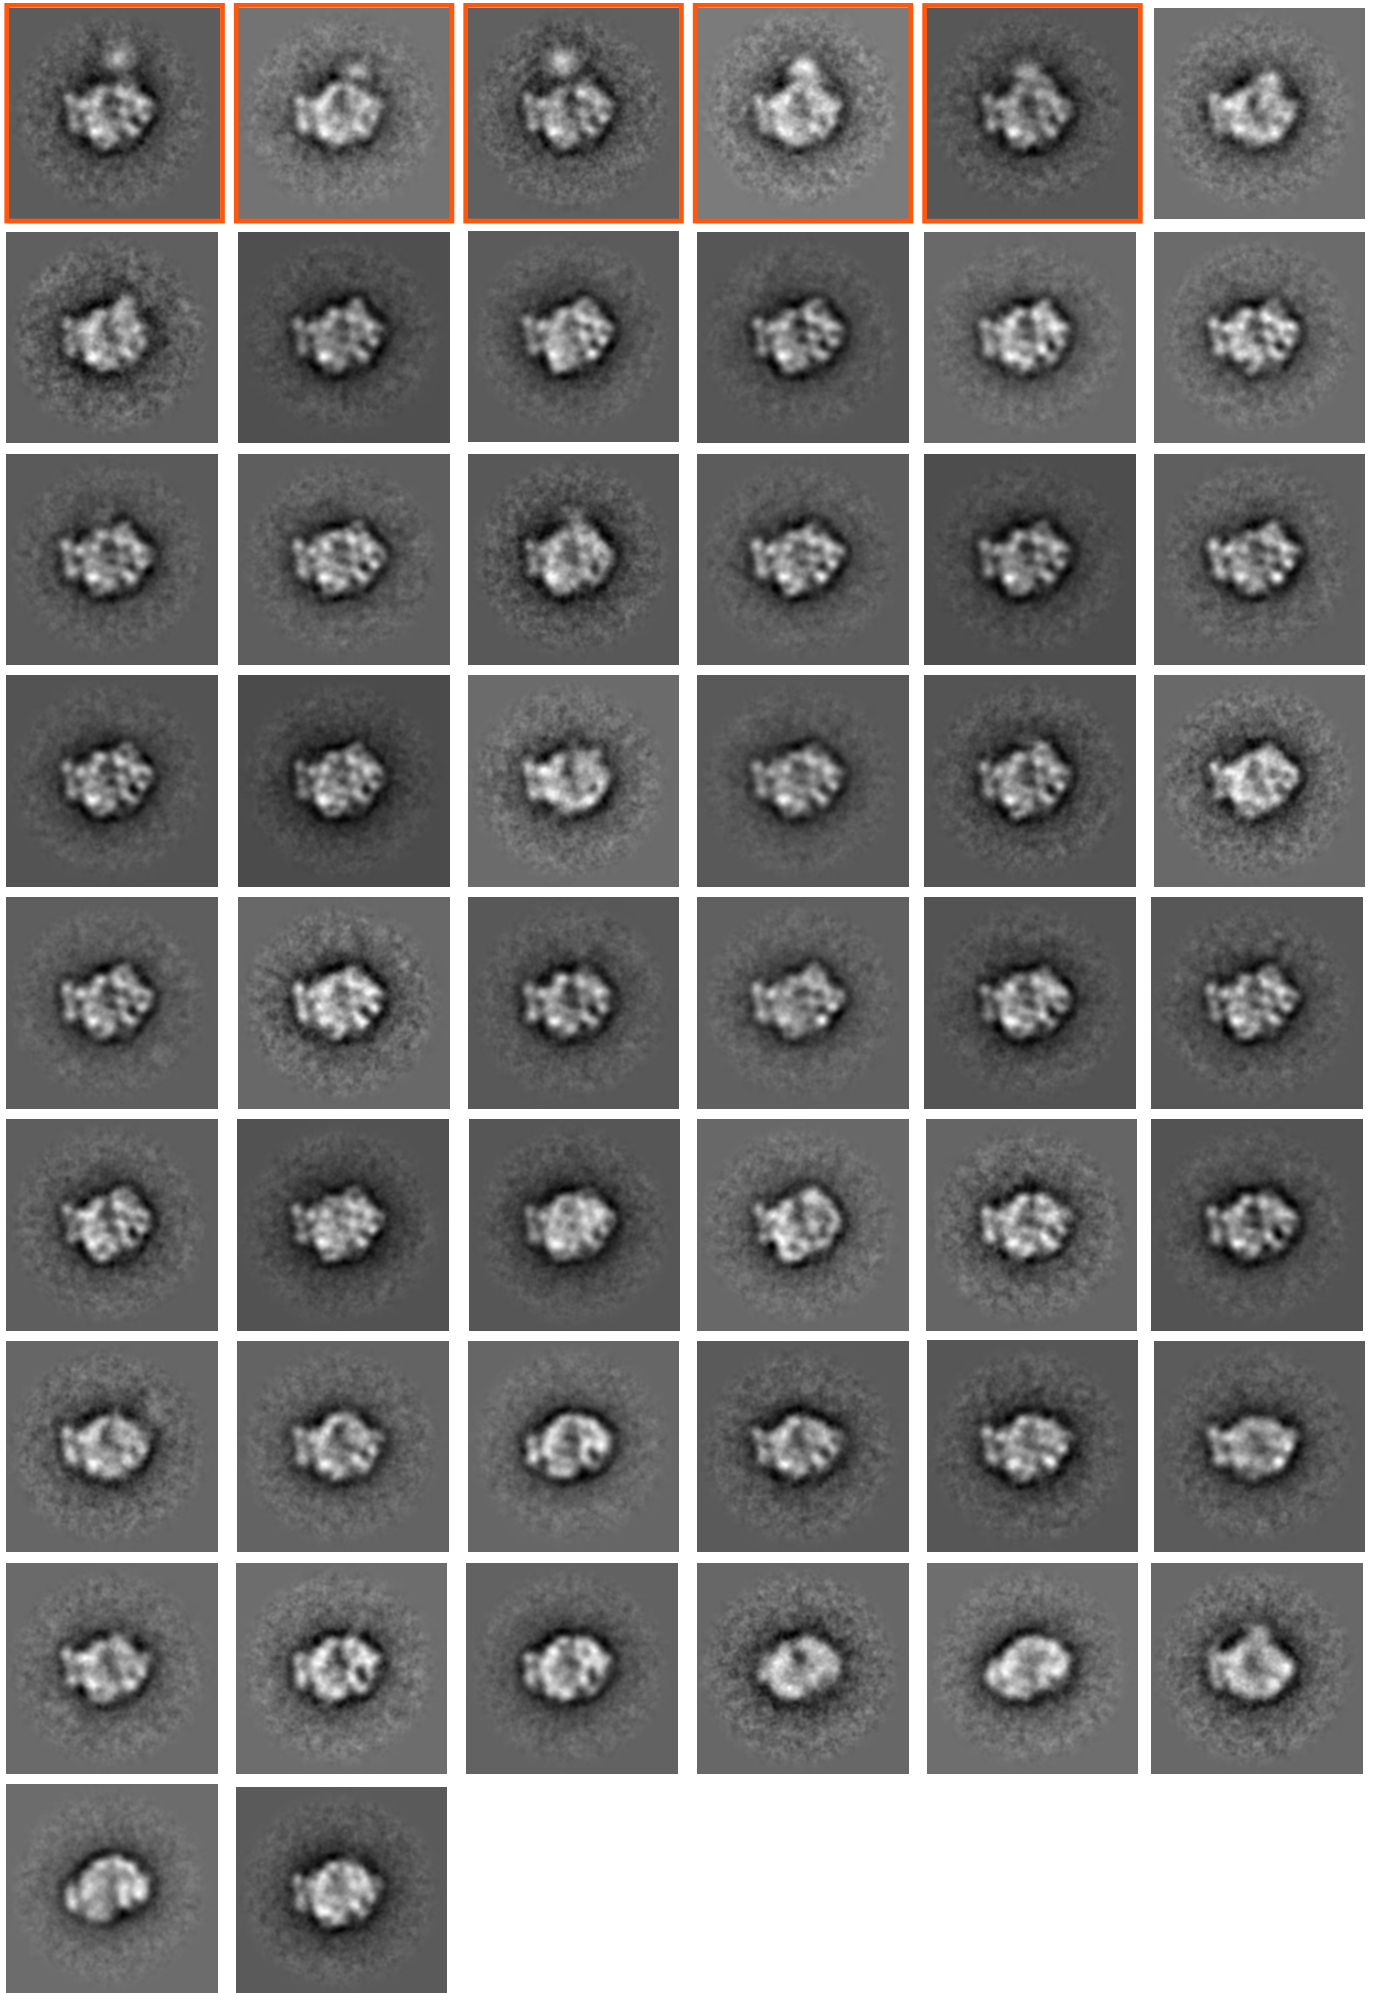

Supplement: 41594_2023_1006_MOESM1_ESM.pdf [file 41594_2023_1006_MOESM1_ESM.pdf]
