# Supplementary material for: Structure of nascent 5S RNPs at the crossroad between ribosome assembly and MDM2–p53 pathways
Source: PubMed Central journal article supplement (PMC10442235; doi:10.1038/s41594-023-01006-7), 2023-06-08
Supplement: 41594_2023_1006_MOESM3_ESM.pdf [file 41594_2023_1006_MOESM3_ESM.pdf]

**Supplementary Table 1: Strains, materials and reagents**

|                                                                                                        | SOURCE                    | IDENTIFIER                       |
|--------------------------------------------------------------------------------------------------------|---------------------------|----------------------------------|
| <b>Antibodies</b>                                                                                      |                           |                                  |
| Anti-FLAG-Peroxidase                                                                                   | Sigma-Aldrich             | Cat# H7425                       |
| Anti-Protein A                                                                                         | Sigma-Aldrich             | Cat# P3775                       |
| Anti-HA                                                                                                | Abcam                     | Cat# ab18181                     |
| RPL5 Antibody                                                                                          | Cell Signaling Technology | Cat# 14568                       |
| <b>Chaetomium thermophilum strains</b>                                                                 |                           |                                  |
|                                                                                                        |                           | ID in Hurt Lab spores collection |
| <i>C. thermophilum</i> : Erg1::P <sub>ACTIN</sub> -pA-TEV-FLAG- <i>ctRPF2</i> (CTHT_0061110)           | This study                | <i>ctRpf2</i> -FtpA              |
| <i>C. thermophilum</i> : Erg1::P <sub>ACTIN</sub> -pA-TEV-FLAG- <i>ctRRS1</i> (CTHT_0057260)           | This study                | <i>ctRrs1</i> -FtpA              |
| <i>C. thermophilum</i> : Erg1::P <sub>ACTIN</sub> -pA-TEV-FLAG- <i>ctSYO1</i> (CTHT_0033460)           | This study                | <i>ctSyo1</i> -FtpA              |
| <b>Yeast strains</b>                                                                                   |                           |                                  |
|                                                                                                        |                           | ID in Hurt Lab yeast collection  |
| <b>w303</b> wild type ( <i>S. cerevisiae</i> )                                                         | 1                         | Y-3609                           |
| <b><i>syo1Δ</i></b> :<br>w303: SYO1::natNT2                                                            | 2                         | Y-3833                           |
| <b><i>syo1Δ</i>, <i>rpl5Δ</i> shuffle strain</b> :<br>w303: SYO1::natNT2; RPL5::His3MX6, pRS316-scUL18 | 2                         | Y-4575                           |
| <b><i>rpf2Δ</i> shuffle strain</b> :<br>w303: RPF2::natNT2; pRS316-RPF2                                | This study                | Y-5697                           |
| <b><i>rrs1Δ</i> shuffle strain</b> :<br>w303: RRS1::natNT2, pRS316-RRS1                                | This study                | Y-5693                           |
| <b><i>syo1Δ</i>, <i>rpf2Δ</i> shuffle strain</b> :<br>w303: SYO1::natNT2, RPF2::His3MX6, pRS316-RPF2   | This study                | Y-6381                           |
| <b>Nsa1-FtpA</b> :<br>w303: NSA1-FtpA:natNT2                                                           | This study                | Y-6382                           |
| <b>Nsa3-FtpA</b> :<br>w303: NSA3-FtpA:natNT2                                                           | This study                | Y-6383                           |
| <b>Yvh1-FtpA</b> :<br>w303: YVH1-FtpA:klURA3                                                           | This study                | Y-5560                           |
| <b>Nsa1-FtpA, GAL::HA-Rpf2</b> :<br>w303: NSA1-FtpA:natNT2, His3MX6:P <sub>GAL</sub> -HA-RPF2          | This study                | Y-6384                           |
| <b>Nsa1-FtpA, GAL::HA-Rrs1</b> :<br>w303: NSA1-FtpA:natNT2, His3MX6:P <sub>GAL</sub> -HA-RRS1          | This study                | Y-6385                           |

|                                                                                                                                                  |              |                                   |
|--------------------------------------------------------------------------------------------------------------------------------------------------|--------------|-----------------------------------|
| <b>Nsa1-FtpA, GAL::HA-uL18:</b><br>w303: NSA1-FtpA:natNT2, His3MX6:P <sub>GAL</sub> -HA-UL18                                                     | This study   | Y-6386                            |
| <b>Nsa3-FtpA, GAL::HA-Rpf2:</b><br>w303: NSA3-FtpA:natNT2, His3MX6:P <sub>GAL</sub> -HA-RPF2                                                     | This study   | Y-6387                            |
| <b>Nsa3-FtpA, GAL::HA-Rrs1:</b><br>w303: NSA3-FtpA:natNT2, His3MX6:P <sub>GAL</sub> -HA-RRS1                                                     | This study   | Y-6388                            |
| <b>Nsa3-FtpA, GAL::HA-uL18:</b><br>w303: NSA3-FtpA:natNT2, His3MX6:P <sub>GAL</sub> -HA-UL18                                                     | This study   | Y-6389                            |
| <b>GAL::HA-Rpf2, GAL:HA-Rrs1:</b><br>w303: His3MX6:P <sub>GAL</sub> -HA-RPF2, His3MX6:P <sub>GAL</sub> -HA-RRS1                                  | This study   | Y-6390                            |
| <b>PJ69-4:</b><br>Strain for yeast two-hybrid assays                                                                                             | <sup>3</sup> | Y-4969                            |
|                                                                                                                                                  |              |                                   |
| <b>Plasmids</b>                                                                                                                                  |              | ID in Hurt Lab plasmid collection |
| Expression plasmid as negative control <b>YEplac112</b><br><i>2μ replication origin, TRP1 marker</i>                                             | 4            | #550                              |
| Expression plasmid as negative control <b>YEplac181</b><br><i>2μ replication origin, LEU2 marker</i>                                             | 4            | #552                              |
| Expression plasmid as negative control <b>YEplac195</b><br><i>2μ replication origin, URA3 marker</i>                                             | 4            | #551                              |
| Expression plasmid as negative control <b>YCplac22</b><br><i>CEN4 (centromer vector), TRP1 marker</i>                                            | 4            | #547                              |
| Expression plasmid as negative control <b>YCplac111</b><br><i>CEN4 (centromer vector), LEU2 marker</i>                                           | 4            | #4549                             |
| Co-expression of <b>ctRpf2</b> and <b>FLAG-ctRrs1:</b><br>pYEplac112-ctRPF2-P <sub>GAL1/10</sub> -FLAG-ctRRS1                                    | This study   | #6884                             |
| Expression of <b>pA-TEV-ctSyo1:</b><br>pYEplac181-P <sub>GAL1/10</sub> -ProteinA-TEV-ctSYO1                                                      | This study   | #6885                             |
| Co-expression of <b>scRpf2</b> and <b>FLAG-scRrs1:</b><br>pYEplac112-scRpf2-P <sub>GAL1/10</sub> -FLAG-scRRs1                                    | This study   | #6886                             |
| Expression of <b>pA-TEV-scSyo1:</b><br>pYEplac181-P <sub>GAL1/10</sub> -ProteinA-TEV-scSyo1                                                      | This study   | #6887                             |
| Plasmid for co-expression of <b>scuL18</b> and <b>scuL5:</b><br>pYEplac195-scUL18-P <sub>GAL1/10</sub> -scUL5                                    | This study   | #6888                             |
| Plasmid for co-expression of <b>scuL18</b> and <b>pA-TEV-scuL5:</b><br>pYEplac195-scUL18-P <sub>GAL1/10</sub> -ProteinA-TEV-scUL5                | This study   | #6889                             |
| Plasmid for expression of <b>scSyo1:</b><br>pYEplac181-P <sub>GAL1/10</sub> -scSYO1                                                              | This study   | #6890                             |
| Plasmid for co-expression of <b>scRpf2ΔC</b> and <b>FLAG-scRrs1ΔC:</b><br>pYEplac112-scRPF2(1-252aa)-P <sub>GAL1/10</sub> -FLAG-scRRS1(1-108 aa) | This study   | #6891                             |
| Plasmid for co-expression of <b>scuL18-HA</b> and <b>scuL5-3xGFP:</b><br>pYEplac195-scUL18-HA-P <sub>GAL1/10</sub> -scUL5-(3x)yeGFP              | This study   | #6892                             |
| Plasmid for expression of <b>pA-TEV-Syo1-HA:</b><br>pYEplac181-P <sub>GAL1/10</sub> -ProteinA-TEV-scSYO1-HA                                      | This study   | #6893                             |
| Plasmid for co-expression of <b>scRpf2-HA</b> and <b>FLAG-HA-scRrs1:</b><br>pYEplac112-scRPF2-HA-P <sub>GAL1/10</sub> -FLAG-HA-scRRS1            | This study   | #6894                             |
| Plasmid for co-expression of <b>scuL5-HA</b> and <b>scuL18-HA:</b><br>pYCplac195-scUL5-HA-P <sub>GAL1/10</sub> -scUL18-HA                        | This study   | #6895                             |

|                                                                                                                                                              |            |         |
|--------------------------------------------------------------------------------------------------------------------------------------------------------------|------------|---------|
| Plasmid for co-expression of <b>hsRrs1</b> and <b>FLAG-hsRpf2</b> :<br>pYCplac112- <i>hsRRS1</i> -P <sub>GAL1/10</sub> -FLAG- <i>hsRPF2</i>                  | This study | #6896   |
| Plasmid for co-expression of <b>hsuL18</b> and <b>pA-TEV-hsuL5</b> :<br>pYCplac181- <i>hsUL18</i> -P <sub>GAL1/10</sub> -ProteinA-TEV- <i>hsUL5</i>          | This study | #6897   |
| Plasmid for expression of <b>hsSyo1</b> :<br>pYCplac195-PGAL1/10-HEATR3                                                                                      | This study | P #6898 |
| Plasmid for expression of <b>scRpf2-FtpA</b> :<br>pYCplac111-P <sub>RPF2</sub> - <i>scRPF2</i> -FLAG-TEV-ProteinA                                            | This study | #5785   |
| Plasmid for expression of <b>hsRpf2-FtpA</b> :<br>pYCplac111-P <sub>RPF2</sub> - <i>hsRPF2</i> -FLAG-TEV-ProteinA                                            | This study | #6899   |
| Plasmid for expression of <b>scRpf2-FtpA</b> ( <i>in vivo</i> binding assay):<br>pYCplac111-P <sub>RPF2</sub> - <i>scRPF2</i> -FLAG-TEV-ProteinA             | This study | #5785   |
| Plasmid for expression of <b>scRpf2ΔC-FtpA</b> ( <i>in vivo</i> binding assay):<br>pYCplac111-P <sub>RPF2</sub> - <i>scRPF2</i> (1-252 aa)-FLAG-TEV-ProteinA | This study | #5805   |
| Plasmid for expression of <b>scRrs1</b> ( <i>in vivo</i> binding assay):<br>pYCplac22-P <sub>RRS1</sub> - <i>scRRS1</i>                                      | This study | #6900   |
| Plasmid for expression of <b>scRrs1ΔC</b> ( <i>in vivo</i> binding assay):<br>pYCplac22-P <sub>RRS1</sub> - <i>scRRS1</i> (1-108 aa)                         | This study | #6901   |
| Plasmid for expression of <b>scRpf2</b> (complementation assays):<br>pYCplac111-P <sub>RPF2</sub> - <i>scRPF2</i>                                            | This study | #6902   |
| Plasmid for expression of <b>scRpf2ΔC</b> (complementation assays):<br>pYCplac111-P <sub>RPF2</sub> - <i>scRPF2</i> (1-252 aa)                               | This study | #6903   |
| Plasmid for expression of <b>scRrs1</b> (complementation assays):<br>pYCplac111-P <sub>RRS1</sub> - <i>scRRS1</i>                                            | This study | #5749   |
| Plasmid for expression of <b>scRrs1ΔC</b> (complementation assays):<br>pYCplac111-P <sub>RRS1</sub> - <i>scRRS1</i> (1-108 aa)                               | This study | #6904   |
| Plasmid for expression of <b>hsRpf2</b> (complementation assays):<br>pYCplac111-P <sub>RPF2</sub> - <i>hsRPF2</i>                                            | This study | #6905   |
| Plasmid for expression of <b>ctRpf2</b> (complementation assays):<br>pYCplac111-P <sub>RPF2</sub> - <i>ctRPF2</i>                                            | This study | #6906   |
| Plasmid for expression of <b>hsRrs1</b> (complementation assays):<br>pYCplac111-P <sub>RRS1</sub> - <i>hsRRS1</i>                                            | This study | #6907   |
| Plasmid for expression of <b>ctRrs1</b> (complementation assays):<br>pYCplac111-P <sub>RRS1</sub> - <i>ctRRS1</i>                                            | This study | #6908   |
| Plasmid for expression of <b>scRpf2</b> (over-expression assays):<br>pYEplac112-P <sub>GAL1/10</sub> - <i>scRPF2</i>                                         | This study | #6909   |
| Plasmid for expression of <b>scRpf2ΔC</b> (over-expression assays):<br>pYEplac112-P <sub>GAL1/10</sub> - <i>scRPF2</i> (1-252 aa)                            | This study | #6910   |
| Plasmid for expression of <b>scRrs1</b> (over-expression assays):<br>pYEplac112-P <sub>GAL1/10</sub> - <i>scRRS1</i>                                         | This study | #5815   |
| Plasmid for expression of <b>scRrs1ΔC</b> (over-expression assays):<br>pYEplac112-P <sub>GAL1/10</sub> - <i>scRRS1</i> (1-108 aa)                            | This study | #5816   |
| Plasmid for <b>25S rRNA(H81-H87)</b> <i>in vitro</i> synthesis (EMSA assays):<br>pBlueScript-P <sub>T7</sub> -25SrRNA(H81-H87)                               | This study | #6911   |
| Plasmid for <b>Phe-tRNA</b> <i>in vitro</i> synthesis (EMSA assays):<br>pBlueScript-P <sub>T7</sub> -tRNA <sup>PHE</sup>                                     | This study | #512    |
| Plasmid for expression of <b>scuL18</b> (yeast growth analysis):<br>pYCplac111-P <sub>UL18</sub> - <i>scUL18</i>                                             | This study | #6912   |
| Plasmid for expression of <b>scuL18 169G&gt;S</b> (yeast growth analysis):<br>pYCplac111-P <sub>UL18</sub> - <i>scUL18</i> (169 G>S)                         | This study | #6913   |

|                                                                                                                                     |              |       |
|-------------------------------------------------------------------------------------------------------------------------------------|--------------|-------|
| Plasmid for expression of <b>scSyo1</b> (yeast growth analysis):<br>pYCplac22-P <sub>SYO1</sub> -scSYO1                             | This study   | #6914 |
| Plasmid for expression of <b>scSyo1-A</b> (yeast growth analysis):<br>pYCplac22-P <sub>SYO1</sub> -scSYO1 (118 K>E)                 | This study   | #6915 |
| Plasmid for expression of <b>scSyo1-B</b> (yeast growth analysis):<br>pYCplac22-P <sub>SYO1</sub> -scSYO1 (74K>E, 76K>E)            | This study   | #6916 |
| Plasmid for expression of <b>scSyo1-AB</b> (yeast growth analysis):<br>pYCplac22-P <sub>SYO1</sub> -scSYO1 (74K>E, 76K>E, 118 K>E)  | This study   | #6917 |
| Plasmid for expression of <b>FLAG-scuL18</b> :<br>pYEplac112-P <sub>GAL1/10</sub> -FLAG-scuL18                                      | This study   | #6918 |
| Plasmid for expression of <b>FLAG-scuL18 169G&gt;S</b> :<br>pYEplac112-P <sub>GAL1/10</sub> -FLAG-scuL18 (169G>S)                   | This study   | #6919 |
| Plasmid for expression of <b>pA-TEV-scSyo1-AB</b> :<br>pYEplac181-P <sub>GAL1/10</sub> -ProteinA-TEV-scSYO1 (74K>E, 76K>E, 118 K>E) | This study   | #6920 |
| Plasmid for expression of <b>hsSyo1-FLAG</b> :<br>pYEplac181-P <sub>GAL1/10</sub> -MDM2-FLAG                                        | This study   | #6921 |
| Plasmid for co-expression of <b>hsuL5</b> and <b>hsuL18-TEV-pA</b> :<br>pYEplac112-hsUL5-P <sub>GAL1/10</sub> -hsUL18-TEV-ProteinA  | This study   | #6922 |
| Plasmid for expression of <b>hsuL18-TEV-pA (1-20 aa)</b> :<br>pYEplac112-P <sub>GAL1/10</sub> -hsUL18(1-20 aa)-TEV-ProteinA         | This study   | #6936 |
| Plasmid for expression of <b>hsuL18-TEV-pA (1-30 aa)</b> :<br>pYEplac112-P <sub>GAL1/10</sub> -hsUL18(1-30 aa)-TEV-ProteinA         | This study   | #6923 |
| Plasmid for expression of <b>hsuL18-TEV-pA (1-41 aa)</b> :<br>pYEplac112-P <sub>GAL1/10</sub> -hsUL18(1-41 aa)-TEV-ProteinA         | This study   | #6924 |
| Plasmid for expression of <b>hsuL18-TEV-pA (21-297 aa)</b> :<br>pYEplac112-P <sub>GAL1/10</sub> -hsUL18(21-297 aa)-TEV-ProteinA     | This study   | #6925 |
| Plasmid for expression of <b>hsuL18-TEV-pA (31-297 aa)</b> :<br>pYEplac112-P <sub>GAL1/10</sub> -hsUL18(31-297 aa)-TEV-ProteinA     | This study   | #6926 |
| Plasmid for expression of <b>hsuL18-TEV-pA (42-297 aa)</b> :<br>pYEplac112-P <sub>GAL1/10</sub> -hsUL18(42-297 aa)-TEV-ProteinA     | This study   | #6927 |
| Yeast two-hybrid control plasmid <b>pGADT7-SV40</b> :<br>LEU2 marker, T7 promoter, SV40-AD (Activation Domain)                      | <sup>5</sup> | #3724 |
| Plasmid for expression of <b>hsuL18</b> (Y2H assay):<br>pGADT7-hsUL18-AD                                                            | This study   | #6928 |
| Plasmid for expression of <b>hsuL18 (1-20 aa)</b> (Y2H assay):<br>pGADT7-hsUL18(1-20 aa)-AD                                         | This study   | #6929 |
| Plasmid for expression of <b>hsuL18 (1-30 aa)</b> (Y2H assay):<br>pGADT7-hsUL18(1-30 aa)-AD                                         | This study   | #6930 |
| Plasmid for expression of <b>hsuL18 (1-41 aa)</b> (Y2H assay):<br>pGADT7-hsUL18(1-41 aa)-AD                                         | This study   | #6931 |
| Plasmid for expression of <b>hsuL18 (21-297 aa)</b> (Y2H assay):<br>pGADT7-hsUL18(21-297 aa)-AD                                     | This study   | #6932 |
| Plasmid for expression of <b>hsuL18 (31-297 aa)</b> (Y2H assay):<br>pGADT7-hsUL18(31-297 aa)-AD                                     | This study   | #6933 |
| Plasmid for expression of <b>hsuL18 (22-297 aa)</b> (Y2H assay):<br>pGADT7-hsUL18(42-297 aa)-AD                                     | This study   | #6934 |
| Yeast two-hybrid control plasmid <b>pGBKT7-p53</b> :<br>TRP1 marker, T7 promoter, p53-BD (Binding Domain)                           | <sup>6</sup> | #3467 |

|                                                                                                 |                             |                                 |
|-------------------------------------------------------------------------------------------------|-----------------------------|---------------------------------|
| Plasmid for expression of <b>MDM2</b> (Y2H assay):<br>pGBKT7-MDM2-BD                            | This study                  | #6935                           |
| <b>Reagents and chemicals</b>                                                                   |                             |                                 |
| 3X FLAG® Peptide lyophilized powder                                                             | Sigma-Aldrich               | Cat# F3290                      |
| TEV protease                                                                                    | Sigma-Aldrich               | Cat# T4455                      |
| SIGMAFAST™ Protease inhibitor tablets for general use                                           | Sigma-Aldrich               | Cat# S8820                      |
| [alpha-P32] UTP, 3000 Ci/mmol, 10 mCi/ml                                                        | Hartman Analytic            | Cat# SRP-210                    |
| IGEPAL® CA-630                                                                                  | Sigma-Aldrich               | Cat# I8896                      |
| DSS-H12/D12                                                                                     | Creative<br>Molecules       | Cat# 001S                       |
| Coomassie Brilliant Blue R-250                                                                  | Thermo Fisher<br>Scientific | Cat# 20278                      |
| SYBR®Green II RNA gel stain                                                                     | Sigma-Aldrich               | Cat# S9305                      |
| ANTI-FLAG® M2 Affinity Gel                                                                      | Sigma-Aldrich               | Cat# A2220                      |
| IgG Sepharose® 6 Fast Flow                                                                      | Sigma-Aldrich               | Cat# GE17-0969-01               |
| HiScribe-T7 High Yield RNA Synthesis Kit                                                        | NEB                         | Cat# E2040S                     |
| NuPAGE™ 4 to 12%, Bis-Tris                                                                      | Thermo Fisher<br>Scientific | Cat# NP0322PK2,<br>Cat# WG1403A |
| <b>Oligonucleotides</b>                                                                         |                             |                                 |
| <i>S. cerevisiae</i> 5S rRNA probe:<br>5'-CTACTCGGTCAGGCTC-3'                                   | This study                  | N/A                             |
| <i>C. thermophilum</i> 5S rRNA probe:<br>5'-TCAGTGGCTTGTCTATGG-3'                               | This study                  | N/A                             |
| <b>Software and algorithms</b>                                                                  |                             |                                 |
| MaxQuant software v1.6.17.0.<br><a href="https://www.maxquant.org">https://www.maxquant.org</a> | 7                           | N/A                             |
| xQuest<br><a href="http://proteomics.ethz.ch">http://proteomics.ethz.ch</a>                     | 8                           | N/A                             |
| xProphet<br><a href="http://proteomics.ethz.ch">http://proteomics.ethz.ch</a>                   | 9                           | N/A                             |

|                                                                                                                                                                                             |       |     |
|---------------------------------------------------------------------------------------------------------------------------------------------------------------------------------------------|-------|-----|
| xiNet<br><a href="http://crosslinkviewer.org/">http://crosslinkviewer.org/</a>                                                                                                              | 10    | N/A |
| Xlink Analyzer<br><a href="https://www.embl-hamburg.de/XlinkAnalyzer/XlinkAnalyzer.html">https://www.embl-hamburg.de/XlinkAnalyzer/XlinkAnalyzer.html</a>                                   | 11    | N/A |
| UCSF Chimera<br><a href="https://www.cgl.ucsf.edu/chimera/">https://www.cgl.ucsf.edu/chimera/</a>                                                                                           | 12    | N/A |
| UCSF ChimeraX<br><a href="https://www.cgl.ucsf.edu/chimerax/">https://www.cgl.ucsf.edu/chimerax/</a>                                                                                        | 13    | N/A |
| EMAN2<br><a href="https://blake.bcm.edu/emanwiki/EMAN2">https://blake.bcm.edu/emanwiki/EMAN2</a>                                                                                            | 14    | N/A |
| IMAGIC-4D<br><a href="https://www.imagescience.de/imagick-4d.html">https://www.imagescience.de/imagick-4d.html</a>                                                                          | 15    | N/A |
| Gctf<br><a href="https://www2.mrc-lmb.cam.ac.uk/research/locally-developed-software/zhang-software/">https://www2.mrc-lmb.cam.ac.uk/research/locally-developed-software/zhang-software/</a> | 16    | N/A |
| CTFFIND4<br><a href="https://grigoriefflab.umassmed.edu/ctffind4">https://grigoriefflab.umassmed.edu/ctffind4</a>                                                                           | 17    | N/A |
| CrYOLO<br><a href="https://cryolo.readthedocs.io/en/stable/">https://cryolo.readthedocs.io/en/stable/</a>                                                                                   | 18    | N/A |
| cryoSPARC<br><a href="https://cryosparc.com/">https://cryosparc.com/</a>                                                                                                                    | 19    | N/A |
| Relion 3.1<br><a href="https://relion.readthedocs.io/en/latest/">https://relion.readthedocs.io/en/latest/</a>                                                                               | 20,21 | N/A |
| SWISS-MODEL<br><a href="https://swissmodel.expasy.org">https://swissmodel.expasy.org</a>                                                                                                    | 22    | N/A |
| Coot<br><a href="https://www2.mrc-lmb.cam.ac.uk/personal/pemsley/coot/">https://www2.mrc-lmb.cam.ac.uk/personal/pemsley/coot/</a>                                                           | 23    | N/A |
| Phenix<br><a href="http://www.phenix-online.org/">http://www.phenix-online.org/</a>                                                                                                         | 24,25 | N/A |

## Supplemental references

1. Thomas, B. J. & Rothstein, R. Elevated recombination rates in transcriptionally active DNA. *Cell* **56**, 619–630 (1989).
2. Kressler, D. *et al.* Synchronizing Nuclear Import of Ribosomal Proteins with Ribosome Assembly. *Science* **338**, 666–671 (2012).
3. James, P., Halladay, J. & Craig, E. A. Genomic Libraries and a Host Strain Designed for Highly Efficient Two-Hybrid Selection in Yeast. *Genetics* **144**, 1425–1436 (1996).

4. Gietz, R. D. & Sugino, A. New yeast-*Escherichia coli* shuttle vectors constructed with in vitro mutagenized yeast genes lacking six-base pair restriction sites. *Gene* **74**, 527–534 (1988).
5. Chien, C. T., Bartel, P. L., Sternglanz, R. & Fields, S. The two-hybrid system: a method to identify and clone genes for proteins that interact with a protein of interest. *Proc Natl Acad Sci U S A* **88**, 9578–9582 (1991).
6. Luo, Y., Batalao, A., Zhou, H. & Zhu, L. Mammalian two-hybrid system: a complementary approach to the yeast two-hybrid system. *Biotechniques* **22**, 350–352 (1997).
7. Lubber, C. A. *et al.* Quantitative Proteomics Reveals Subset-Specific Viral Recognition in Dendritic Cells. *Immunity* **32**, 279–289 (2010).
8. Leitner, A., Walzthoeni, T. & Aebersold, R. Lysine-specific chemical cross-linking of protein complexes and identification of cross-linking sites using LC-MS/MS and the xQuest/xProphet software pipeline. *Nature Protocols* **9**, 120–137 (2014).
9. Walzthoeni, T. *et al.* False discovery rate estimation for cross-linked peptides identified by mass spectrometry. *Nature Methods* **9**, 901–903 (2012).
10. Combe, C. W., Fischer, L. & Rappsilber, J. xiNET: Cross-link Network Maps With Residue Resolution. *Mol Cell Proteomics* **14**, 1137–1147 (2015).
11. Kosinski, J. *et al.* Xlink Analyzer: Software for analysis and visualization of cross-linking data in the context of three-dimensional structures. *J Struct Biol* **189**, 177–183 (2015).
12. Pettersen, E. F. *et al.* UCSF Chimera—A visualization system for exploratory research and analysis. *Journal of Computational Chemistry* **25**, 1605–1612 (2004).
13. Goddard, T. D. *et al.* UCSF ChimeraX: Meeting modern challenges in visualization and analysis. *Protein Sci* **27**, 14–25 (2018).

14. Tang, G. *et al.* EMAN2: an extensible image processing suite for electron microscopy. *J Struct Biol* **157**, 38–46 (2007).
15. Heel, M. van *et al.* Four-dimensional cryo-electron microscopy at quasi-atomic resolution: IMAGIC 4D. in *International Tables for Crystallography* 624–628 (American Cancer Society, 2012). doi:10.1107/97809553602060000875.
16. Zhang, K. Gctf: Real-time CTF determination and correction. *J Struct Biol* **193**, 1–12 (2016).
17. Rohou, A. & Grigorieff, N. CTFFIND4: Fast and accurate defocus estimation from electron micrographs. *J Struct Biol* **192**, 216–221 (2015).
18. Wagner, T. *et al.* SPHIRE-crYOLO is a fast and accurate fully automated particle picker for cryo-EM. *Commun Biol* **2**, 218 (2019).
19. Punjani, A., Rubinstein, J. L., Fleet, D. J. & Brubaker, M. A. cryoSPARC: algorithms for rapid unsupervised cryo-EM structure determination. *Nat Methods* **14**, 290–296 (2017).
20. Zivanov, J. *et al.* New tools for automated high-resolution cryo-EM structure determination in RELION-3. *Elife* **7**, (2018).
21. Zivanov, J., Nakane, T. & Scheres, S. H. W. Estimation of high-order aberrations and anisotropic magnification from cryo-EM data sets in RELION-3.1. *IUCrJ* **7**, 253–267 (2020).
22. Waterhouse, A. *et al.* SWISS-MODEL: homology modelling of protein structures and complexes. *Nucleic Acids Res* **46**, W296–W303 (2018).
23. Emsley, P. & Cowtan, K. Coot: model-building tools for molecular graphics. *Acta Crystallogr D Biol Crystallogr* **60**, 2126–2132 (2004).
24. Adams, P. D. *et al.* PHENIX: a comprehensive Python-based system for macromolecular structure solution. *Acta Crystallogr D Biol Crystallogr* **66**, 213–221 (2010).



25. Liebschner, D. *et al.* Macromolecular structure determination using X-rays, neutrons and electrons: recent developments in Phenix. *Acta Cryst D* **75**, 861–877 (2019).
