# Supplementary material for: Structure of nascent 5S RNPs at the crossroad between ribosome assembly and MDM2–p53 pathways
Source: PubMed Central journal article supplement (PMC10442235; doi:10.1038/s41594-023-01006-7), 2023-06-08

**Fig. 1c - 2nd and 3rd panels (Northern blots)**

Probe: sc5S rRNA  
(5'-CTACTCGGTCAGGCTC-3')

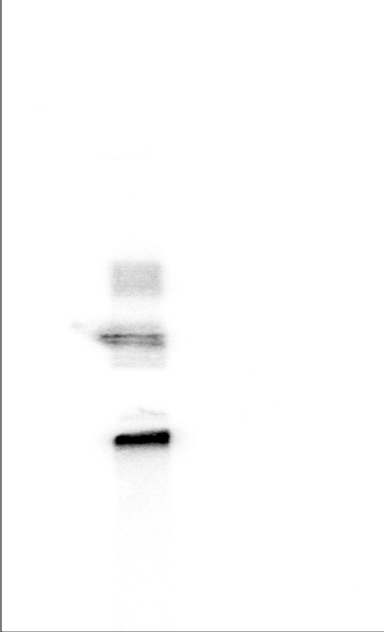

Probe: ct5S rRNA  
(5'-TCAGTGGCTTGTCTATGG-3')

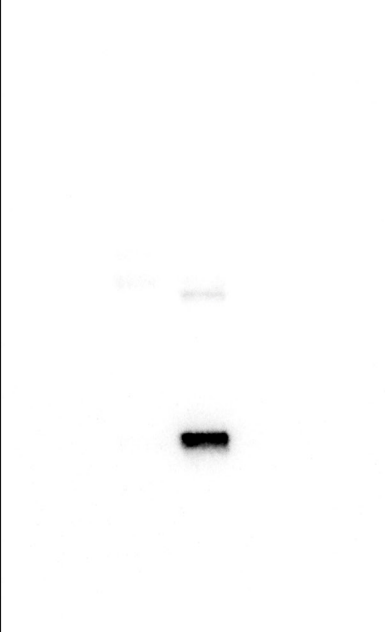

Supplement: 41594_2023_1006_MOESM5_ESM.pdf [file 41594_2023_1006_MOESM5_ESM.pdf]
