# Supplementary material for: Structure of nascent 5S RNPs at the crossroad between ribosome assembly and MDM2–p53 pathways
Source: PubMed Central journal article supplement (PMC10442235; doi:10.1038/s41594-023-01006-7), 2023-06-08

**Fig. 5a - Bottom panel (Methylene Blue Staining)**

Unprocessed scan

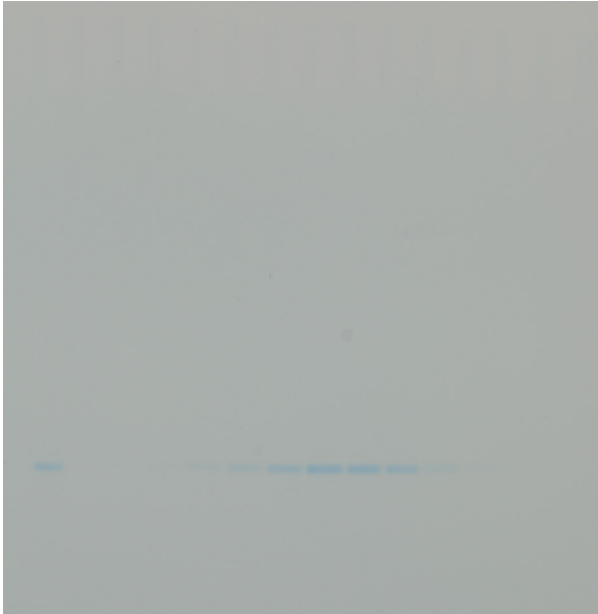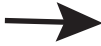

After processing

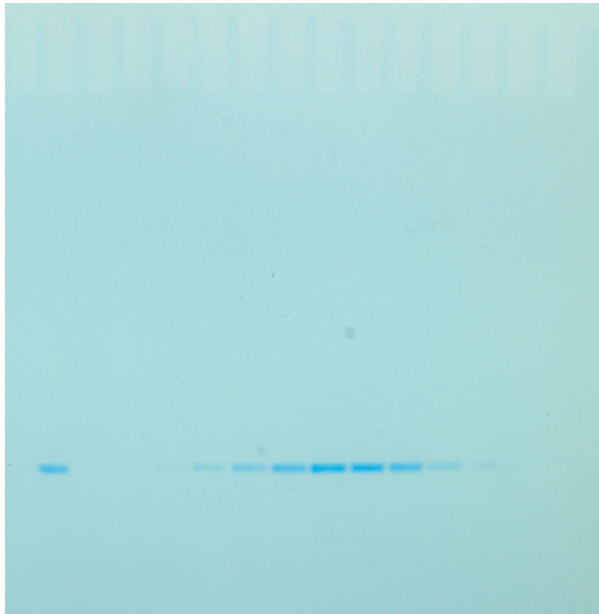

Supplement: 41594_2023_1006_MOESM7_ESM.pdf [file 41594_2023_1006_MOESM7_ESM.pdf]
