# Supplementary material for: Structure of nascent 5S RNPs at the crossroad between ribosome assembly and MDM2–p53 pathways
Source: PubMed Central journal article supplement (PMC10442235; doi:10.1038/s41594-023-01006-7), 2023-06-08

**Fig. 6c - Middle bottom panel (Western Blot)**

Anti-FLAG

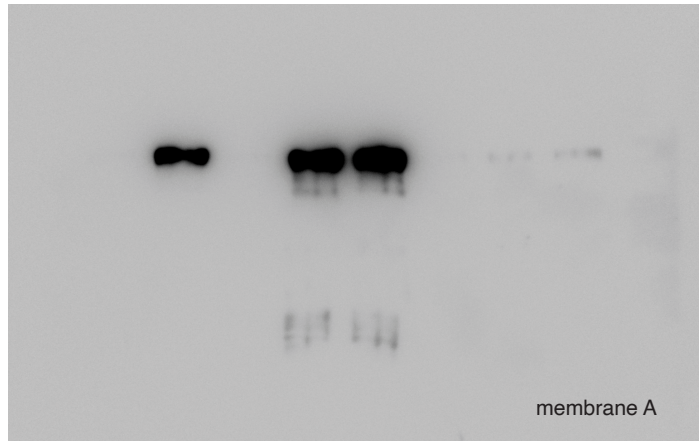

Visible Light for hand marked protein ladder (kDa)

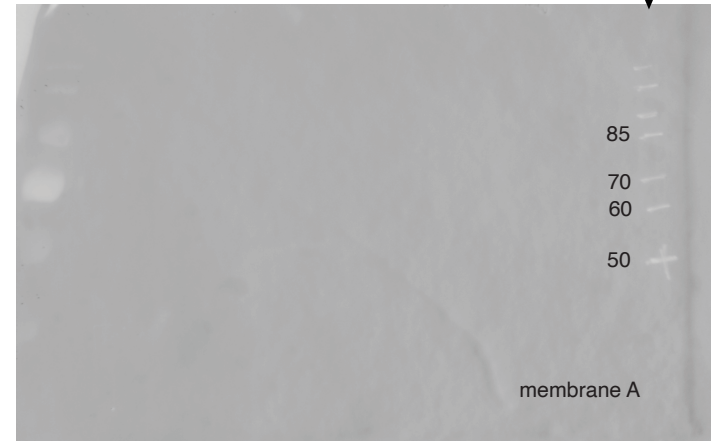

**Fig. 6d - Bottom panels (Methylene Blue Staining)**

Unprocessed scans

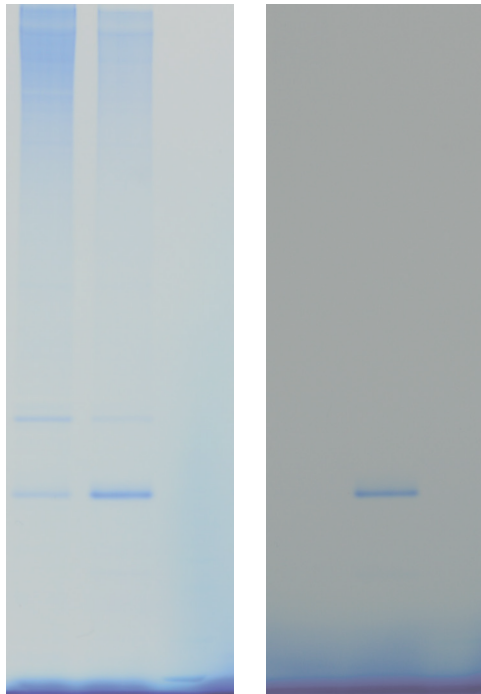

After processing

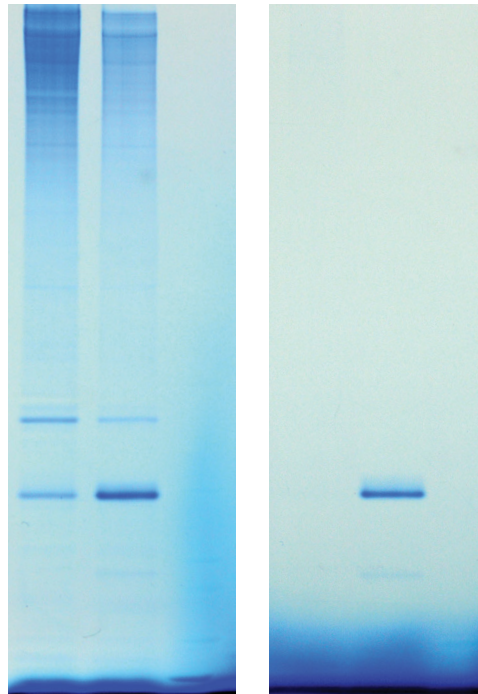

Supplement: 41594_2023_1006_MOESM8_ESM.pdf [file 41594_2023_1006_MOESM8_ESM.pdf]
