# Supplementary material for: Structure of nascent 5S RNPs at the crossroad between ribosome assembly and MDM2–p53 pathways
Source: PubMed Central journal article supplement (PMC10442235; doi:10.1038/s41594-023-01006-7), 2023-06-08

# Extended Data Fig. 5b - Western blots

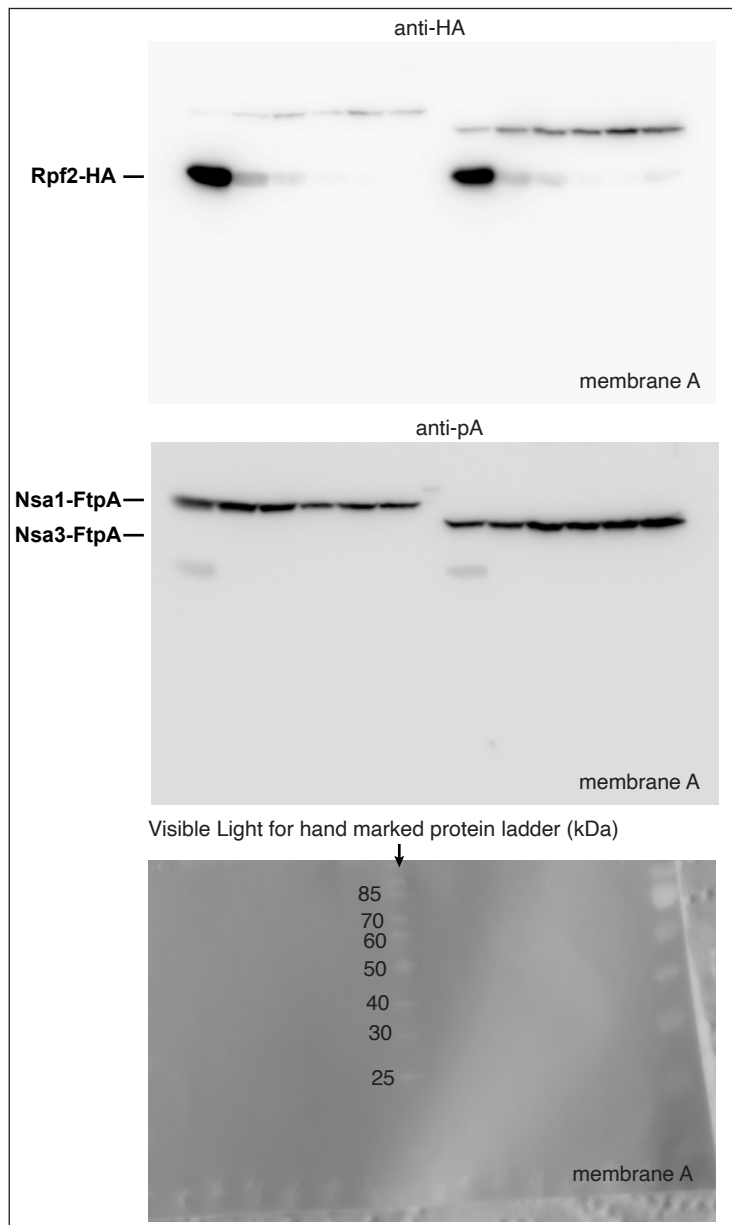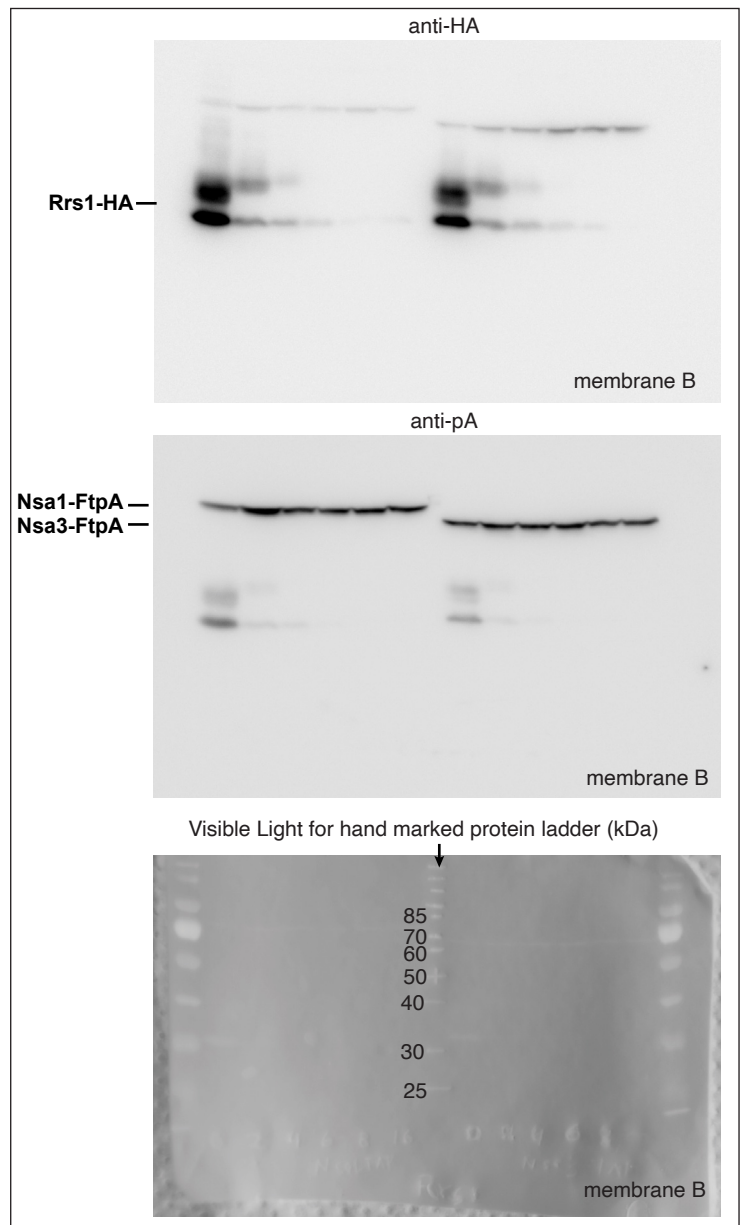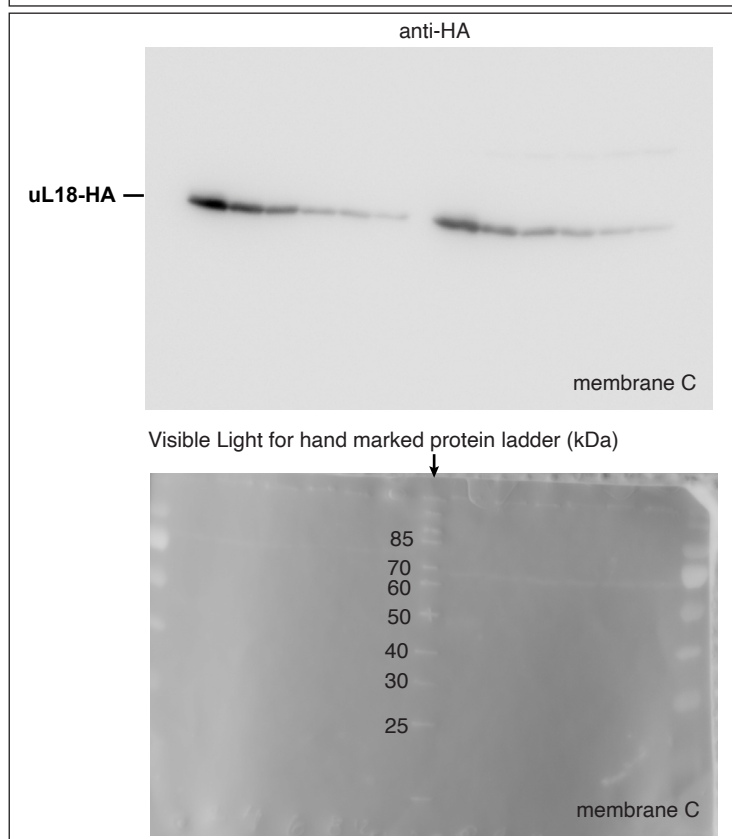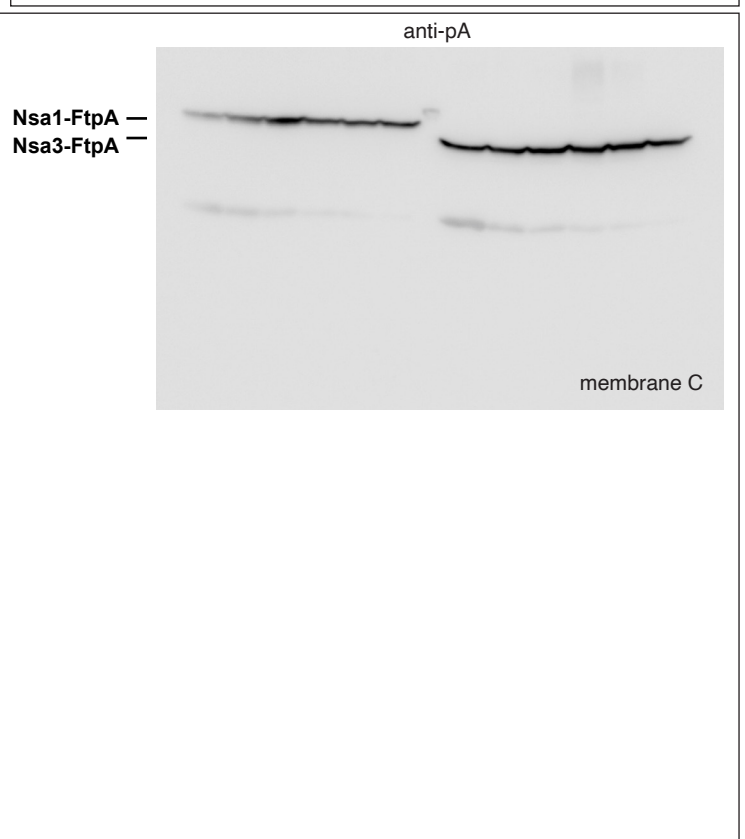

Extended Data Fig. 5c - Bottom panels (Methylene Blue Staining and Western blot)

Nsa1-FtpA

Unprocessed scan

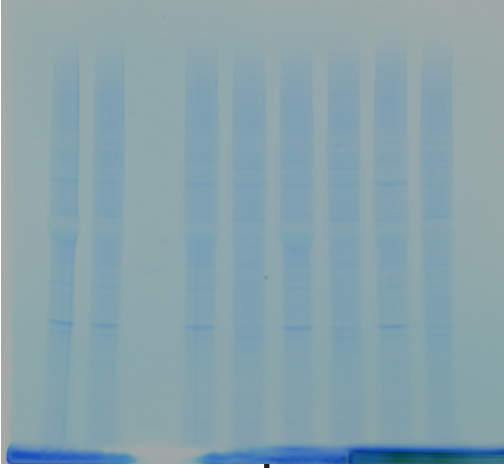

After processing

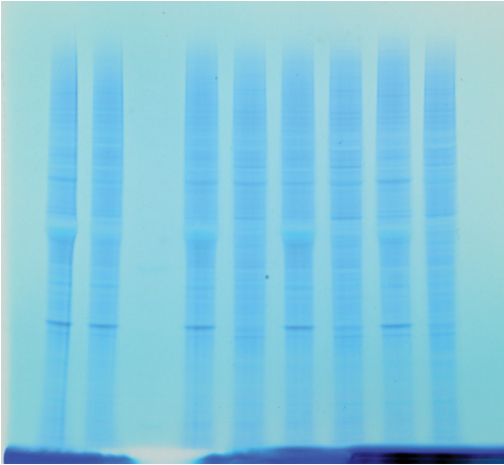

anti-Rpl5 (uL18)

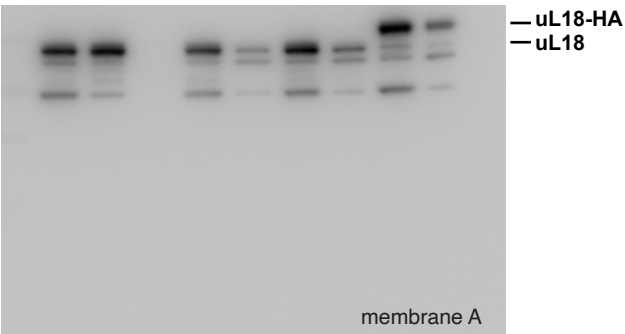

Visible Light for hand marked protein ladder (kDa)

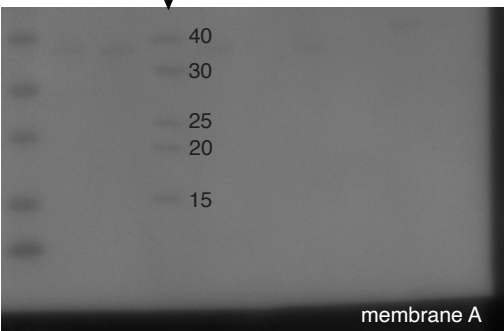

Nsa3-FtpA

Unprocessed scan

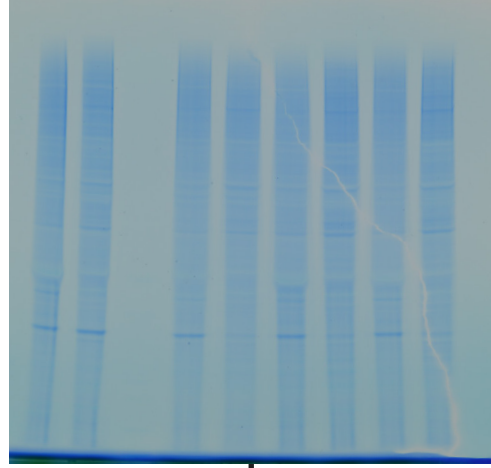

After processing

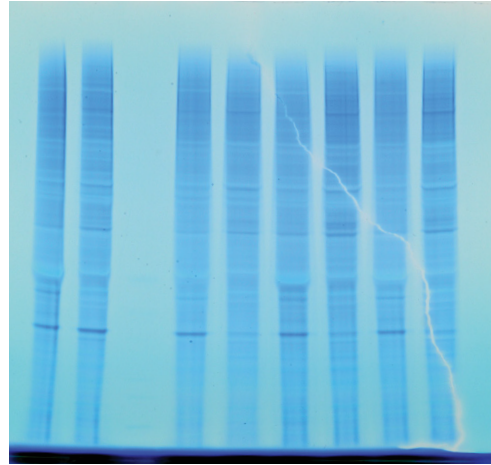

anti-Rpl5 (uL18)

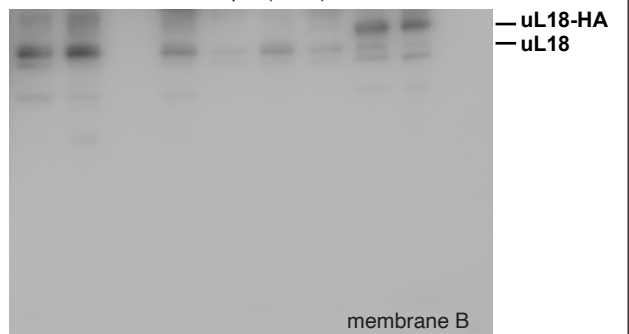

Visible Light for hand marked protein ladder (kDa)

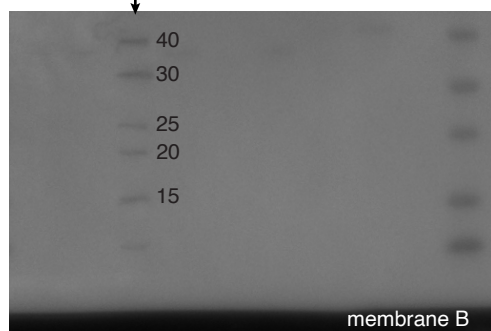

Supplement: 41594_2023_1006_MOESM11_ESM.pdf [file 41594_2023_1006_MOESM11_ESM.pdf]
